1 **Alien chromatin but not *Fhb7* confers Fusarium head blight resistance in wheat breeding**

2

3 Xianrui Guo<sup>1,2†</sup>, Qinghua Shi<sup>1†</sup>, Jing Yuan<sup>1†</sup>, Mian Wang<sup>1,2†</sup>, Jing Wang<sup>3</sup>, Chunhui Wang<sup>1,2</sup>, Jing  
4 Zhang<sup>1</sup>, Shulan Fu<sup>4</sup>, Handong Su<sup>1</sup>, Yang Liu<sup>1,2</sup>, Long Wang<sup>5</sup>, Ke Wang<sup>6</sup>, Donglin Jing<sup>7</sup>, Pingzhi  
5 Zhang<sup>8</sup>, Jinbang Li<sup>9</sup>, Yonghong Zhou<sup>5</sup>, Xingguo Ye<sup>6</sup>, Fangpu Han<sup>1,2\*</sup>

6

7 <sup>1</sup>State Key Laboratory of Plant Cell and Chromosome Engineering, Institute of Genetics and  
8 Developmental Biology, Innovation Academy for Seed Design, Chinese Academy of Sciences,  
9 Beijing, 100101, China

10 <sup>2</sup>University of Chinese Academy of Sciences, Beijing 100049, China

11 <sup>3</sup>Center for Agricultural Resources Research, Institute of Genetics and Developmental Biology,  
12 Chinese Academy of Sciences, Shijiazhuang, 050022, China

13 <sup>4</sup>College of Agronomy, Sichuan Agricultural University, Wenjiang, Chengdu, 611130, China

14 <sup>5</sup>Triticeae Research Institute, Sichuan Agricultural University, Wenjiang, Chengdu, 611130, China

15 <sup>6</sup>Institute of Crop Sciences, Chinese Academy of Agricultural Sciences, Beijing, 100081, China

16 <sup>7</sup>Xingtai Academy of Agricultural Sciences, Xingtai, 054000, China

17 <sup>8</sup>Institute of Crop Sciences, Anhui Academy of Agricultural Sciences, Hefei, 230000, China

18 <sup>9</sup>Nanyang Academy of Agricultural Sciences, Nanyang, 473000, China

19

20 †These authors contributed equally to this work.

21 \*Correspondence to [fphan@genetics.ac.cn](mailto:fphan@genetics.ac.cn)

22

23

24 Dr. Fangpu Han

25 Institute of Genetics and Developmental Biology

26 Chinese Academy of Sciences, Beijing, 100101, China

27 Email: [fphan@genetics.ac.cn](mailto:fphan@genetics.ac.cn)

28 Phone: +86-10-64807926

29 Fax: +86-10-74854467

30

### 31 **Abstract**

32 Fusarium head blight (FHB), caused by *Fusarium* species, seriously threaten global wheat  
33 production. Three wheat-*Th.elongatum* FHB resistant translocation lines have been developed and  
34 used for breeding. Transcriptomic analysis identified a derivative glutathione S-transferase  
35 transcript T26102, which was homologous to *Fhb7* and induced dramatically by *Fusarium*  
36 *graminearum*. Homologs of *Fhb7* were detected in several genera in Triticeae, including  
37 *Thinopyrum*, *Elymus*, *Leymus*, *Pseudoroegneria* and *Roegneria*. Several wheat-*Thinopyrum*  
38 translocation lines carrying *Fhb7* remain susceptible to FHB, and transgenic plants overexpressing  
39 the T26102 on different backgrounds did not improve the FHB resistance. Taken as a whole, we  
40 show the application of the chromatin derived from diploid *Thinopyrum elongatum* successfully  
41 conferring wheat with high level FHB resistance independent of the *Fhb7*.

42

### 43 **One Sentence Summary**

44 *Thinopyrum elongatum* chromatin from 7EL was successfully applied to wheat FHB resistance  
45 breeding, but the resistant gene other than the reported *Fhb7* remained unknown.

46

47

### 48 **Introduction**

49 Fusarium head blight (FHB), colloquially known as scab, is caused by *Fusarium* species and  
50 remain one of the most devastating wheat diseases in many areas around the world (1). Scab causes  
51 significant yield losses and reduces grain quality because of mycotoxins generated during the  
52 course of infection, such as deoxynivalenol (DON) and nivalenol (NIV) (2, 3). Due to climate

53 change, residue incorporation and frequent crop rotations, FHB now occurs at greater and greater  
54 frequencies, making the task of developing FHB resistance wheat cultivars an urgent priority for  
55 breeders (4-6). While a few wheat accessions with high levels of FHB resistance have been  
56 exploited worldwide, most of them produce small heads, late maturity and other undesirable  
57 agronomic traits that hampered incorporating the resistance to elite cultivars (3). Cultivars Sumai  
58 3 and its derivatives carrying *Fhb1* showed a good combination FHB resistance and yield traits  
59 and have been successfully applied to wheat breeding worldwide (3, 7). However, in spite of a  
60 successful clone of the major resistance gene *Fhb1*, it is difficult to combine the high FHB  
61 resistance with other necessary traits in wheat breeding practice, especially for winter and  
62 facultative wheat (3, 7, 8).

63 The genus *Thinopyrum* contains numerous resistance genes for biotic and abiotic stress and has  
64 been considered as an important genetic resource for wheat improvement (9). Until now, two genes  
65 conferring wheat FHB resistance were mapped on the homologous group seven in *Thinopyrum*  
66 species. Our previous research showed that the wheat-*Th. elongatum* 7E disomic addition line and  
67 substitution lines exhibit high resistance to FHB, and the further analysis confirmed the location  
68 of the resistant gene on the chromosome arm 7EL (10). Functioning as a glutathione S-transferase  
69 (GST) and derived from *Th. ponticum*, *Fhb7* was reported to be located on 7E2 and conferred  
70 broad resistance to *Fusarium* species by detoxifying trichothecenes via de-epoxidation (11, 12).  
71 Many translocation lines have been developed from wild relatives of wheat and applied to wheat  
72 breeding. Some of the most successful example of transferring alien genes to common wheat  
73 include the wheat-rye 1BL/1RS translocation lines with fused centromere (13). These translocation  
74 lines were employed in wheat breeding because of their excellent stripe rust and powdery mildew  
75 resistance (14). Here, we produced a bountiful number of wheat-*Th. elongatum* translocation lines  
76 by radiating the pollens of the ditelosomic addition line 7EL and successfully applied the FHB  
77 resistant translocation lines to wheat breeding without yield penalty. In the process of screening  
78 the FHB resistance genes, we found *Fhb7* and its homologs are not responsible for FHB resistance.

## 79 **Results**

### 80 **Development of wheat-*Th. elongatum* translocation lines**

81 Previously, the long arm of chromosome 7E of *Th. elongatum* was found to harbor a new resistance  
82 gene capable of suppressing FHB spreading on wheat spikes (10). Irradiation was performed on  
83 the pollens of wheat-*Th. elongatum* addition line 7EL at early flowering stage. Following that,  
84 fresh pollens were pollinated to the emasculated spikes of the recurrent parent. In total, 8400 M<sub>1</sub>  
85 seeds were obtained and cytological analyses were performed on all germinated seeds.  
86 Consequently, 671 wheat-*Th. elongatum* translocation lines were identified, accounting for 7.99%  
87 of all developed lines (Table 1). The translocation lines were classified into terminal and intercalary  
88 types by the position of alien chromosome fragments (fig. S1). By the size of alien chromosome  
89 fragments, the terminal translocation lines were furtherly classified into short, medium and long  
90 alien segmental translocation lines (fig. S1). Totally, we obtained 184 short alien segmental  
91 translocation lines, 141 medium alien segmental translocation lines, 247 long alien segmental  
92 translocation lines and 99 intercalary translocation lines (Table 1).

93

### 94 **Application of wheat-*Th. elongatum* translocation lines in FHB resistance breeding**

95 Wheat cultivar Jimai 22 is widely grown in the northern part of China because of its broad  
96 adaptation and high yield potential. In order to improve the integrated agronomic traits of our  
97 developed translocation lines, we back crossed them with Jimai 22 and evaluated FHB resistance  
98 using the single floret inoculation method. Finally, 81 translocation lines were identified with good  
99 resistance to FHB (fig. S2). After backcrossing with Jimai 22 for at least three generations,  
100 homozygous translocation lines were selected from the self-crossed progenies. Out of these, the  
101 short alien segmental translocation lines Zhongke 1878 and Zhongke 166 as well as the long alien  
102 segmental translocation line Zhongke 545 were developed with good integrated agronomic traits  
103 and no significant grain yield penalty (Fig. 1, A and C, and fig. S3, A and B). All the three lines  
104 showed high resistance to FHB, with less diseased spikes after infection in nature and higher yield

105 than the control cultivar Jimai 22 after spraying *Fusarium graminearum* (Fig. 1, B and C, and fig.  
106 S3, C and D). In the national wheat yield contest, the grain yield of Zhongke 166 exceeded that of  
107 the national control Zhoumai 18 by an average of 6.26% in 23 locations (fig. S3E). Cytological  
108 analysis revealed that the translocation occurred on the long arm of chromosome 6D in line  
109 Zhongke1878, and on the long arm of chromosome 7D in line Zhongke 166 and Zhongke 545 (fig.  
110 S4).

111

### 112 **Screening specific transcripts for disease-resistant interval on chromosome 7EL**

113 To explore the nature of the FHB resistance gene in 7EL, we inoculated the spikes of translocation  
114 line Zhongke 1878 with *Fusarium graminearum* and performed full-length transcriptome  
115 sequencing after ninety-six hours. Among 34996 transcripts, 520 transcripts were filtered out as  
116 candidates expressing only from 7EL by blasting against the reference genome of Chinese Spring  
117 (CS) and the nucleotide database of *Fusarium graminearum* on the National Center for  
118 Biotechnology Information (NCBI). According to the identified sequences, one to three pairs of  
119 primers for each transcript were designed. In order to screen the transcripts specific to alien  
120 chromatin, polymerase chains reaction (PCR) was performed using genomic DNA of wheat-*Th.*  
121 *elongatum* addition line 7EL, CS, Zhongke 1878 and Jimai 22. Finally, 25 transcripts specific to  
122 the disease-resistant interval in line Zhongke 1878 were screened (fig. S5 and Data S1). Among  
123 them, 7 transcripts were annotated as resistant proteins containing the NB-ARC domain and 10 as  
124 unknown proteins (Table 2). Additionally, other proteins found included proteins such as a receptor  
125 kinase, ATPase subunit, dirigent-jacalin protein, GST family, nucleosome assembly protein, cold  
126 induced protein and retrotransposon protein (Table 2). Annotated as a GST protein, T26102 was  
127 chosen for further study because it was induced drastically 48h after inoculation with *Fusarium*  
128 *graminearum*, which was confirmed by qRT-PCR (Fig. 2A and fig. S6A). We also collected the  
129 RNA-seq data of CS-7EL line 4 d after water and *Fusarium graminearum* inoculation previously  
130 reported from NCBI (15), which further confirmed the induction of T26102 by *Fusarium*

131 *graminearum* (fig. S6B).

132

### 133 **Distribution of T26102 in Triticeae**

134 To explore the evolution of T26102, its homologs were checked in different wheat-*Thinopyrum*  
135 derivatives. The T26102 homologs were detected in the addition line 7EL, our developed wheat-*Th.*  
136 *elongatum* translocation lines, such as Zhongke 1878, and the wheat-*Th.ponticum* translocation  
137 lines 4460 and 4462 (Fig. 2B). The homologs of T26102 were also detected in wheat-*Thinopyrum*  
138 partial amphiploids, such as octoploid SNTE20, XY693 and XY7631, and hexaploid 8802 and  
139 8803 (Fig. 2B). Totally, 122 species belonging to Triticeae were collected and used for detecting  
140 the T26102 homologs (Data S2). Except for *Thinopyrum*, the homologs of T26102 were detected  
141 in four other genera, i.e., *Elymus*, *Leymus*, *Pseudoroegneria* and *Roegneria* (Fig. 2B).

142 By comparing sequences, we found that T26102 was homologous to the reported *Fhb7* with only  
143 two amino acids difference between them. Furthermore, the protein sequences were at least 95%  
144 identical across all the T26102 homologs in Triticeae plants (fig. S7). In some species, more than  
145 one homolog was discovered. We detected two homologs of T26102 in our developed wheat-*Th.*  
146 *elongatum* translocation lines, such as Zhongke 1878 and Zhongke 166 (fig. S7). Three homologs  
147 of T26102 were detected in the *Th. intermedium* accession PI 440001 (fig. S7). Despite indel  
148 variation and amino acid substitution across all the homologs of T26102, no premature termination  
149 and code-shifting mutations occurred in the protein sequences. The main variation was the number  
150 of Thr-Ser at the amino terminus of the protein sequence (fig. S7).

151

### 152 **Functional identification of T26102 homologs**

153 To identify the function of T26102, we evaluated the FHB resistance on wheat-*Thinopyrum*  
154 derivatives carrying the homologs of T26102. Surprisingly, obvious differences of FHB resistance  
155 were detected among different lines carrying the homolog of T26102. The wheat-*Th. ponticum*  
156 translocation lines 4460, 4462 and wheat-*Th. elongatum* translocation line Zhongke 1878 all

157 carried the T26102 homolog (Fig. 2B and fig. S8). However, the translocation lines 4460 and 4462  
158 were susceptible to FHB, whereas the Zhongke 1878 was resistant to FHB (Fig. 3A). Sequence  
159 alignment analysis revealed that the protein sequences in 4460 and 4462 lines were identical to the  
160 reported *Fhb7* from the 7E2/7D substitution line (fig. S7). Furthermore, some wheat-*Thinopyrum*  
161 partial amphiploids carrying the homolog of T26102 were also identified as susceptible to FHB,  
162 such as octaploid SNTE20 (Fig. 3A and fig. S8). Expression analysis revealed that the expression  
163 of T26102 homologs was induced in 4460, 4462 and SNTE20 after inoculating with *Fusarium*  
164 *graminearum* (Fig. 3B). We also discovered that lines 4460 and 4462 shared an identical promoter  
165 with *Fhb7* from the 7E2/7D substitution (fig. S9). On the other hand, it was noticed that the partial  
166 amphiploids 8802 and 8803 carried the same homolog of T26102 (fig. S7 and fig. S8). However,  
167 they reacted differently to *Fusarium graminearum*, with 8802 showing high resistance and 8803  
168 showing high susceptibility (Fig. 3C). Lines 8802 and 8803 also shared an identical promoter (fig.  
169 S9). The expression of T26102 homolog in 8802 and 8803 was confirmed to be drastically induced  
170 at 96h after inoculating with *Fusarium graminearum* (Fig. 3D). These results thus raised serious  
171 questions about the ability of T26102 to confer resistance to FHB.

172 To verify the FHB resistance function of T26102, we took the overexpression vector pUbi::T26102  
173 and transformed it into two wheat accessions Jimai 22 and 19AS161, both of which are highly  
174 susceptible to FHB. The transgenic positive wheat plants overexpressing T26102 were used for  
175 FHB resistance evaluation (Fig. 4A). Compared to the wild types, no T<sub>0</sub> transgenic lines showed  
176 an improved FHB resistance regardless of any genetic background (Fig. 4B). This result further  
177 suggests that T26102 is not the pivotal gene that confers wheat with resistance to FHB.

178

## 179 **Discussion**

180 Crop wild relatives are undeniably beneficial to modern agriculture because they provide breeders  
181 with a broad pool of potentially useful genetic resources, especially with regard to the resistance  
182 to disease and pest (16). Translocation lines between wheat and its wild relatives have been

183 successfully applied to wheat breeding, such as the wheat-rye 1BL/1RS translocation line and the  
184 wheat-*Haynaldia villosa* 6AL/6VS translocation line (13, 17). The usefulness of the translocation  
185 lines is dependent on whether the alien fragment could compensate for the replaced wheat  
186 segments (18). In our study, translocation lines between wheat and *Th. elongatum* were  
187 successfully applied to wheat FHB resistance breeding without yield penalty, and the translocation  
188 for Zhongke 166 and Zhongke 545 occurred on chromosome 7DL. Their high yield potential in  
189 the pilot experiment might be attributed to the compensation from the translocated 7EL segment  
190 with the lost 7DL segment. Our practice revealed that Zhongke 1878, whose translocation occurred  
191 on 6DL, also exhibited good yield potential. This result suggests that the application of  
192 translocation lines should not be limited to the translocations between homeologous chromosomes.  
193 Small segmental translocation lines with Fusarium head blight resistance can help narrow down  
194 the region carrying the resistant gene. We applied this strategy to our work, and selected twenty-  
195 five transcripts specific for disease-resistant regions on 7EL. We focused on T26102 because of  
196 its dramatical induction after inoculation with *Fusarium graminearum* and its similarity to *Fhb7*.  
197 Recently, *Fhb7*, also encoding the GST protein, was reported to confer wheat with a broad  
198 resistance to *Fusarium* species and it was acquired by horizontal gene transfer (HGT) from  
199 *Epichloë* to *Thinopyrum* (12). Interestingly, except for *Thinopyrum*, we were able to find homologs  
200 of *Fhb7* in several species within the genera of *Elymus*, *Leymus*, *Pseudoroegneria* and *Roegneria*.  
201 This was unsurprising, given that *Epichloë* often formed symbiotic associations with temperate  
202 grasses of the subfamily *Pooideae* (19). Thus to us HGT did not appear to be an accidental  
203 happening by chance only in *Thinopyrum*. It is possible that HGT happened before Triticeae  
204 differentiation, or else *Fhb7* ought to be detected in the genus *Triticum* at large, which currently  
205 does not appear to be the case.

206 Perhaps more interesting is the fact that T26102 is not causal in conferring FHB resistance. Out of  
207 all the T26102 overexpression transgenic lines, none were able to improve FHB resistance.  
208 Furthermore, some wheat-*Thinopyrum* translocation lines and partial amphiploids carrying the



209 homologs of T26102 were also identified susceptible to FHB. The homologs of *Fhb7* and their  
210 promoter region were exactly the same in partial amphiploids 8802 and 8803, which exhibited a  
211 contrasting reaction after inoculating with *Fasurium graminearum*. Above all, wheat-*Th. ponticum*  
212 translocation lines 4460 and 4462, that carried an identical protein sequence to *Fhb7* in the 7E2/7D  
213 substitution line also failed to confer resistance. These results indicate to us that T26102, including  
214 its homologs, are not responsible for FHB resistance.

215 Studies based on meiotic chromosome pairing revealed that *Th. elongatum* chromosome 7E paired  
216 occasionally with *Th. ponticum* chromosomes 7E1 and 7E2 in hybrids, with frequencies of meiotic  
217 pairing rates of 19.85 and 2.52, respectively (20). The genetic relationships based on molecular  
218 markers also revealed that 7E was distant from 7E1 and 7E2 (20). It was reported that  
219 resynthesized polyploids and natural polyploids have undergone many genetic changes, including  
220 sequence deletion, rDNA loci changes, transposon activation and chromosomal rearrangement  
221 (21-27). All these findings suggest that 7E and 7E2 have difference on the DNA level. *Fhb7* was  
222 mapped to the distal end of 7E2 between the *XSdauK79* and *XSdauK80* markers based on  
223 recombinations between 7E1 and 7E2 (12, 20). Although ~1.2 Mb region between the two markers  
224 was identified on the 7E chromosome, the DNA components between the two mapping intervals  
225 of 7E and 7E2 might be quite different. The fortuitous findings of FHB resistant candidate genes  
226 from *Th. ponticum* are unlikely to be replicated using *Th. elongatum* as a reference genome.

227 So long as FHB remain as a major threat to worldwide agriculture, identifying and exploiting  
228 resistance genes will always prove to be a useful endeavor. The lack of resistance conferred by the  
229 *Fhb7* homologue T26102 in our work indicates that the bona fide resistance gene still lies  
230 undiscovered, making it a suitable target for future work.

231

## 232 **References and Notes:**

- 233 1. R. Dean, J. A. Van Kan, Z. A. Pretorius, K. E. Hammond-Kosack, A. Di Pietro, P. D. Spanu,  
234 J. J. Rudd, M. Dickman, R. Kahmann, J. Ellis, G. D. Foster, The top 10 fungal pathogens

- 235 in molecular plant pathology. *Mol. Plant Pathol.* **13**, 414-430 (2012).
- 236 2. M. McMullen, R. Jones, D. Gallenberg, Scab of wheat and barley: a re-emerging disease  
237 of devastating impact. *Plant Dis.* **81**, 1340-1348 (1997).
- 238 3. G. Bai, G. Shaner, Management and resistance in wheat and barley to Fusarium head blight.  
239 *Annu. Rev. Phytopathol.* **42**, 135-161 (2004).
- 240 4. Z. Ma, Q. Xie, G. Li, H. Jia, J. Zhou, Z. Kong, N. Li, Y. Yuan, Germplasm, genetics and  
241 genomics for better control of disastrous wheat Fusarium head blight. *Theor. Appl. Genet.*  
242 **133**, 1541-1568 (2020).
- 243 5. S. Chakraborty, A. C. Newton, Climate change, plant diseases and food security: an  
244 overview. *Plant Pathol.* **60**, 2-14 (2011).
- 245 6. X. Zhang, J. Halder, R. P. White, D. J. Hughes, Z. Ye, C. Wang, R. Xu, B. Gan, B. D. L.  
246 Fitt, Climate change increases risk of Fusarium ear blight on wheat in central China. *Ann.*  
247 *Appl. Biol.* **164**, 384-395 (2014).
- 248 7. Z. Su, A. Bernardo, B. Tian, H. Chen, S. Wang, H. Ma, S. Cai, D. Liu, D. Zhang, T. Li, H.  
249 Trick, P. St Amand, J. Yu, Z. Zhang, G. Bai, A deletion mutation in *TaHRC* confers *Fhb1*  
250 resistance to Fusarium head blight in wheat. *Nat. Genet.* **51**, 1099-1105 (2019).
- 251 8. G. Li, J. Zhou, H. Jia, Z. Gao, M. Fan, Y. Luo, P. Zhao, S. Xue, N. Li, Y. Yuan, S. Ma, Z.  
252 Kong, L. Jia, X. An, G. Jiang, W. Liu, W. Cao, R. Zhang, J. Fan, X. Xu, Y. Liu, Q. Kong,  
253 S. Zheng, Y. Wang, B. Qin, S. Cao, Y. Ding, J. Shi, H. Yan, X. Wang, C. Ran, Z. Ma,  
254 Mutation of a histidine-rich calcium-binding-protein gene in wheat confers resistance to  
255 Fusarium head blight. *Nat. Genet.* **51**, 1106-1112 (2019).
- 256 9. Q. Chen, Detection of alien chromatin introgression from *Thinopyrum* into wheat using S  
257 genomic DNA as a probe-A landmark approach for *Thinopyrum* genome research.  
258 *Cytogenet. Genome Res.* **109**, 350-359 (2005).
- 259 10. S. Fu, Z. Lv, B. Qi, X. Guo, J. Li, B. Liu, F. Han, Molecular cytogenetic characterization of  
260 wheat-*Thinopyrum elongatum* addition, substitution and translocation lines with a novel

- 261 source of resistance to wheat Fusarium head blight. *J. Genet. Genomics* **39**, 103-110 (2012).
- 262 11. J. Dvořák, Meiotic pairing between single chromosomes of diploid *Agropyron elongatum*  
263 and decaploid *A. elongatum* in *Triticum aestivum*. *Can. J. Genet. Cytol.* **17**, 329-336 (1975).
- 264 12. H. Wang, S. Sun, W. Ge, L. Zhao, L. Kong, Horizontal gene transfer of *Fhb7* from fungus  
265 underlies Fusarium head blight resistance in wheat. *Science* **368**, eaba5435 (2020).
- 266 13. J. Wang, Y. Liu, H. Su, X. Guo, F. Han, Centromere structure and function analysis in  
267 wheat-rye translocation lines. *Plant J.* **91**, 199-207 (2017).
- 268 14. S. V. Rabinovich, Importance of wheat-rye translocations for breeding modern cultivar of  
269 *Triticum aestivum* L. *Euphytica* **100**, 323-340 (1998).
- 270 15. L. Gou, J. Hattori, G. Fedak, M. Balcerzak, A. Sharpe, P. Visendi, D. Edwards, N. Tinker,  
271 Y. Wei, G. Chen, T. Ouellet, Development and validation of expressed molecular markers  
272 specific for the long arm of chromosome 7E. *Crop Sci.* **56**, 354 (2016).
- 273 16. B. V. Ford-Lloyd, M. Schmidt, S. J. Armstrong, O. Barazani, J. Engels, R. Hadas, K.  
274 Hammer, S. P. Kell, D. Kang, K. Khoshbakht, Y. Li, C. Long, B. Lu, K. Ma, V. T. Nguyen,  
275 L. Qiu, S. Ge, W. Wei, Z. Zhang, N. Maxted, Crop wild relatives-undervalued, underutilized  
276 and under threat? *Bioscience* **61**, 559-565 (2011).
- 277 17. L. Xing, P. Hu, J. Liu, K. Witek, S. Zhou, J. Xu, W. Zhou, L. Gao, Z. Huang, R. Zhang, X.  
278 Wang, P. Chen, H. Wang, J. D. G. Jones, M. Karafiátová, J. Vrána, J. Bartoš, J. Doležel, Y.  
279 Tian, Y. Wu, A. Cao, *Pm21* from *Haynaldia villosa* encodes a CC-NBS-LRR protein  
280 conferring powdery mildew resistance in wheat. *Mol. Plant* **11**, 874-878 (2018).
- 281 18. J. D. Faris, S. S. Xu, X. Cai, T. L. Friesen, Y. Jin, Molecular and cytogenetic characterization  
282 of a durum wheat-*Aegilops speltoides* chromosome translocation conferring resistance to  
283 stem rust. *Chromosome Res.* **16**, 1097-1105 (2008).
- 284 19. A. Tanaka, D. Takemoto, T. Chujo, B. Scott, Fungal endophytes of grasses. *Curr. Opin.*  
285 *Plant Biol.* **15**, 462-468 (2012).
- 286 20. J. Guo, F. He, J. Cai, H. W. Wang, A. Li, H. Wang, L. Kong, Molecular and cytological

- 287 comparisons of chromosomes 7el<sub>1</sub>, 7el<sub>2</sub>, 7E<sup>c</sup>, and 7E<sup>i</sup> derived from *Thinopyrum*. *Cytogenet.*  
288 *Genome Res.* **145**, 68-74 (2015).
- 289 21. X. Ma, J. P. Gustafson, Allopolyploidization-accommodated genomic sequence changes in  
290 triticale. *Ann. Bot.* **101**, 825-832 (2008).
- 291 22. X. Guo, F. Han, Asymmetric epigenetic modification and elimination of rDNA sequences  
292 by polyploidization in wheat. *Plant Cell* **26**, 4311-4327 (2014).
- 293 23. H. Shaked, K. Kashkush, H. Ozkan, M. Feldman, A. A. Levy, Sequence elimination and  
294 cytosine methylation are rapid and reproducible responses of the genome to wide  
295 hybridization and allopolyploidy in wheat. *Plant Cell* **13**, 1749-1759 (2001).
- 296 24. C. Parisod, K. Alix, J. Just, M. Petit, V. Sarilar, C. Mhiri, M. Ainouche, B. Chalhouh, M. A.  
297 Grandbastien, Impact of transposable elements on the organization and function of  
298 allopolyploid genomes. *New Phytol.* **186**, 37-45 (2010).
- 299 25. R. T. Gaeta, J. C. Pires, F. Iniguez-Luy, E. Leon, T. C. Osborn, Genomic changes in  
300 resynthesized Brassica napus and their effect on gene expression and phenotype. *Plant Cell*  
301 **19**, 3403-3417 (2007).
- 302 26. J. A. Udall, P. A. Quijada, T. C. Osborn, Detection of chromosomal rearrangements derived  
303 from homologous recombination in four mapping populations of Brassica napus L.  
304 *Genetics* **169**, 967-979 (2005).
- 305 27. L. Comai, Genetic and epigenetic interactions in allopolyploid plants. *Plant Mol. Biol.* **43**,  
306 387-399 (2000).
- 307 28. A. Kato, J. C. Lamb, J. A. Birchler, Chromosome painting using repetitive DNA sequences  
308 as probes for somatic chromosome identification in maize. *Proc. Natl. Acad. Sci. U. S. A.*  
309 **101**, 13554-13559 (2004).
- 310 29. F. Han, J. C. Lamb, J. A. Birchler, High frequency of centromere inactivation resulting in  
311 stable dicentric chromosomes of maize. *Proc. Natl. Acad. Sci. U. S. A.* **103**, 3238-3243  
312 (2006).

- 313 30. M. Lulin, S. Yi, C. Aizhong, Q. Zengjun, X. Liping, C. Peidu, L. Dajun, E. W. Xiu,  
314 Molecular cloning and characterization of an up-regulated UDP-glucosyltransferase gene  
315 induced by DON from *Triticum aestivum* L. cv. Wangshuibai. *Mol. Biol. Rep.* **37**, 785-795  
316 (2010).
- 317 31. M. Pertea, D. Kim, G. M. Pertea, J. T. Leek, S. L. Salzberg, Transcript-level expression  
318 analysis of RNA-seq experiments with HISAT, StringTie and Ballgown. *Nat. Protoc.* **11**,  
319 1650-1667 (2016).
- 320 32. K. Wang, H. Liu, L. Du, X. Ye, Generation of marker-free transgenic hexaploid wheat via  
321 an Agrobacterium-mediated co-transformation strategy in commercial Chinese wheat  
322 varieties. *Plant Biotechnol. J.* **15**, 614-623 (2017).

323

324 **Acknowledgments:** We thank X. Wang (Nanjing Agricultural University) and J.B. Li (Nanyang  
325 Academy of Agricultural Sciences) for providing the *Fusarium* strains, Y.G Bao and H.G. Wang  
326 (Shandong Agricultural University) for providing some partial amphiploid accessions, Y.W. Li  
327 (Institute of Genetics and Developmental Biology, Chinese Academy of Sciences) and Moshe  
328 Feldman (Weizmann Institute of Sciences) for providing *Thinopyrum* species, and M.C. Luo (UC  
329 Davis Plant Sciences) for providing the wheat-*Th. elonatum* addition line 7EL. **Funding:** This  
330 work was supported by the National Key Research and Development Program of China  
331 (2016YFD0102001). **Author contributions:** F.H. designed the project. X.G., M.W. and J.Y.  
332 conducted the experiment and performed data analysis. F.H., Q.S., C.W., L.W., J.W., J.Z., H.S.,  
333 Y.L. and S.F. conducted the field work. K.W. performed the wheat genetic transformation. X.G.,  
334 J.Y. and F.H. wrote the paper. **Competing interests:** The authors declare no competing interests.

335 **Data and materials availability:** All data are available in the manuscript, the supplementary  
336 materials or at the publicly accessible repositories. These data in the public repositories include all  
337 transcriptomic raw reads for the translocation line Zhongke 1878 in NCBI under BioProjectID  
338 (under submission). All materials were available from Fangpu Han.

339 **Supplementary Materials:**

340 Materials and Methods

341 Figures S1-S9

342 Data S1-S2

343

344

345

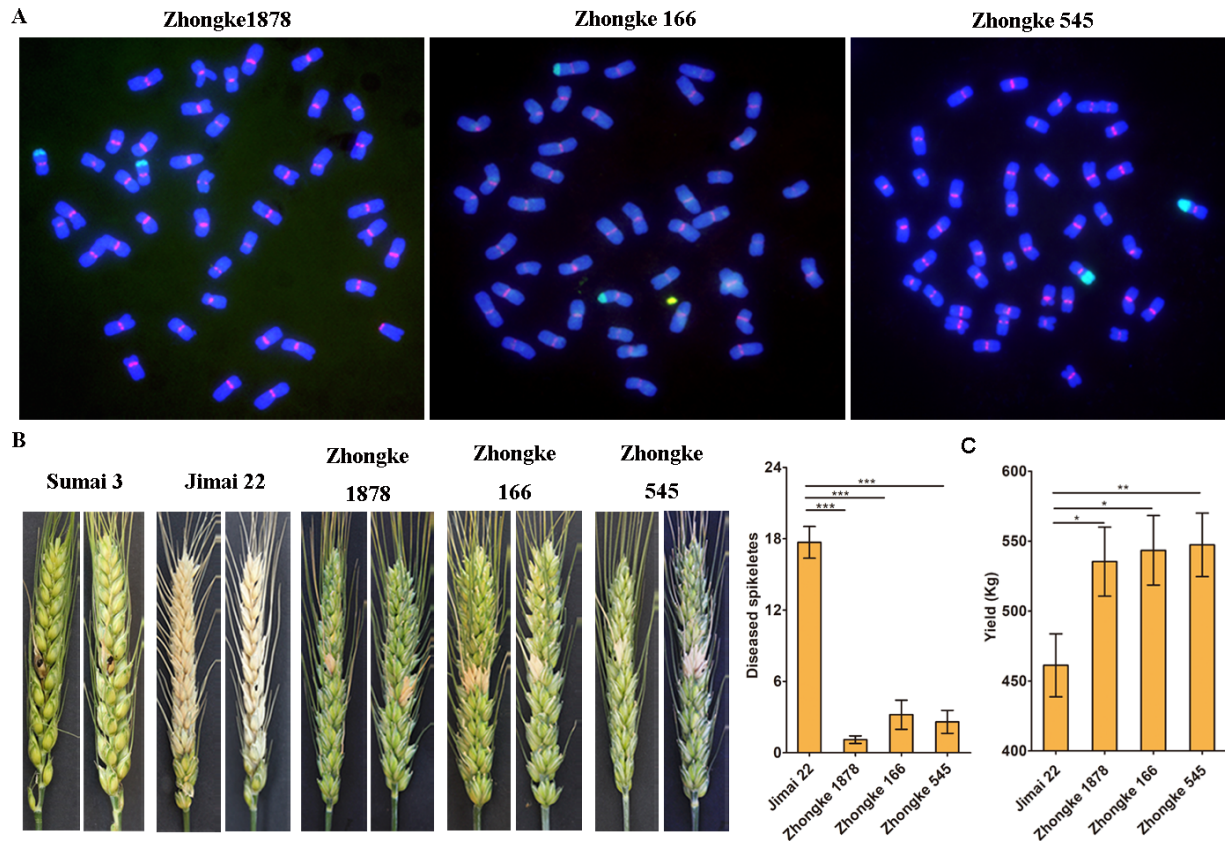

346

347 **Fig. 1. Three wheat-*Th. elongatum* translocation lines with FHB resistance and yield**

348 **advantage.** (A) FISH analysis of the translocation lines Zhongke 1878, Zhongke 166 and Zhongke

349 545. (B) FHB resistance evaluation at 21 d after inoculation in field conditions. Sumai 3 was used

350 as FHB resistant control and Jimai 22 as susceptible control. (C) Grain yield comparisons between

351 translocation lines and the recurrent parent Jimai 22 after spraying *Fusarium graminearum*. The

352 grain yield was measured from a 13.3 m<sup>2</sup> plot in field.

353

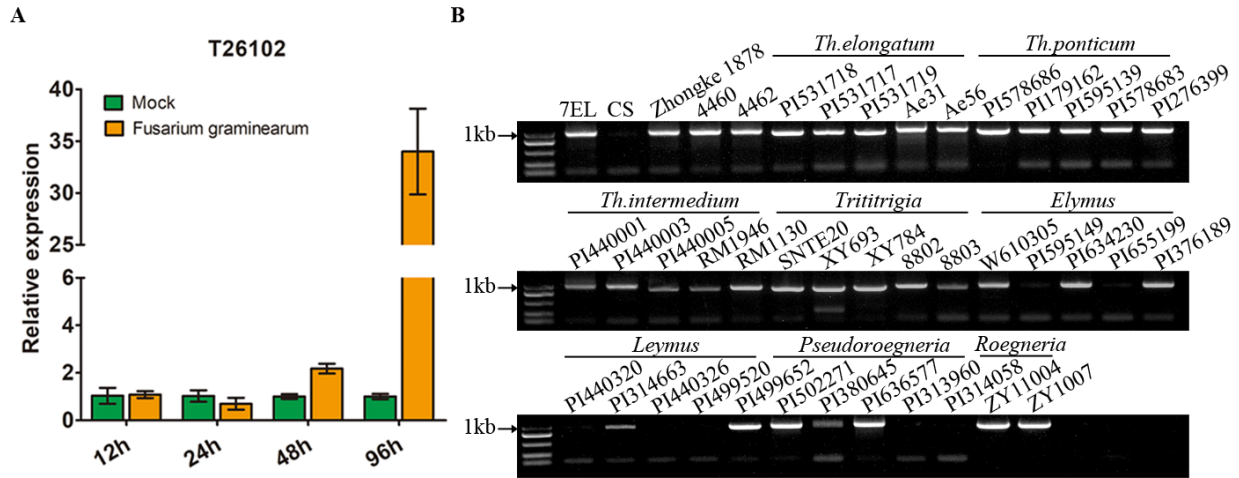

354

355 **Fig. 2. Expression pattern and distribution of T26102.** (A) Expression pattern of T26102 after  
356 inoculating with *Fusarium graminearum*. (B) Detection of T26102 among different species in  
357 Triticeae.

358



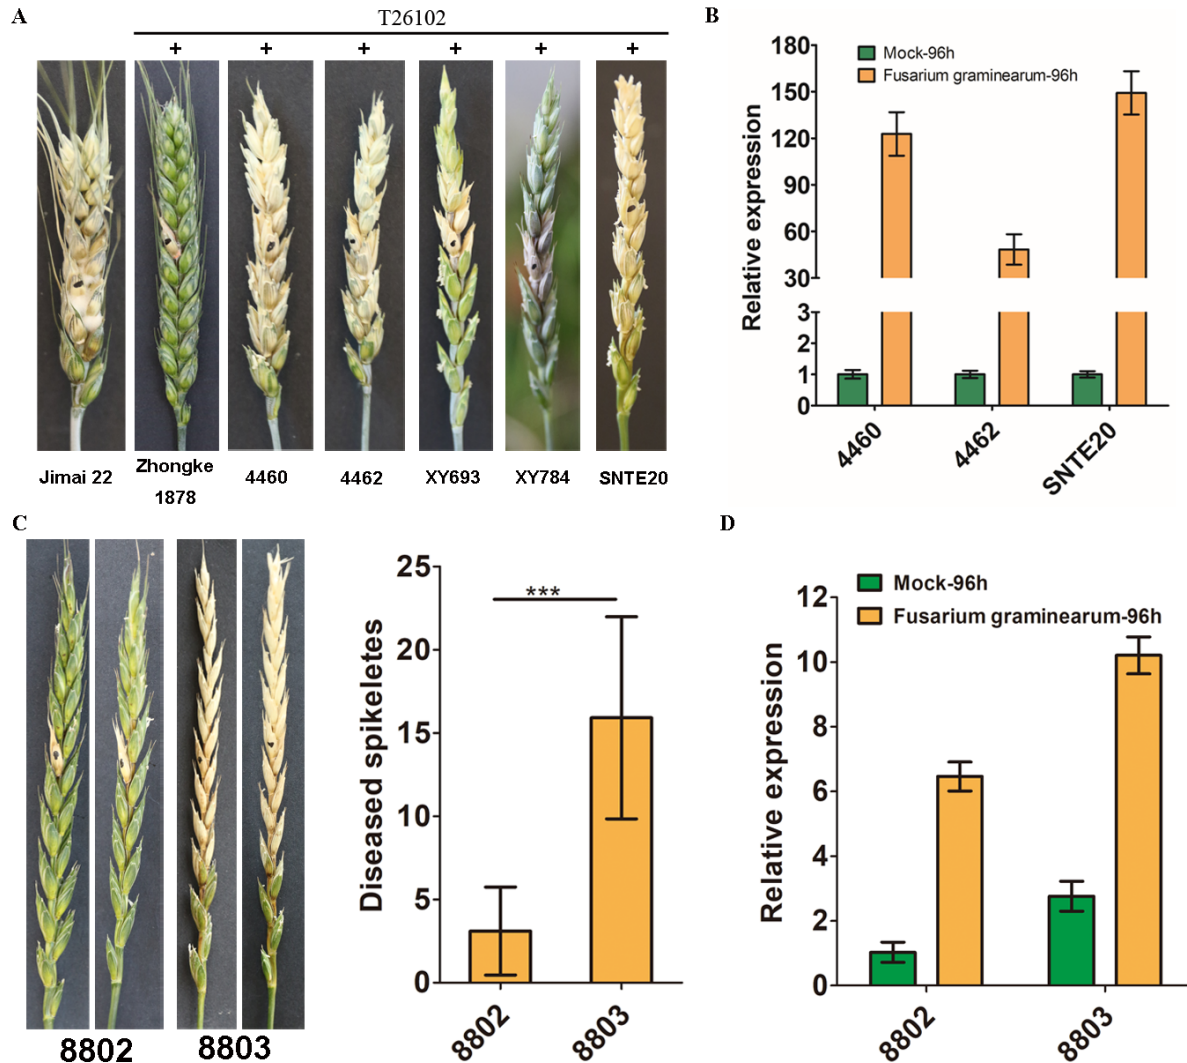

359

360 **Fig. 3. FHB resistance evaluation and expression analysis of wheat-*Thinopyrum* derivative**

361 **carrying T26102.** (A) FHB resistance comparison among translocation lines and octaploid partial

362 amphiploids. The resistance was evaluated at 10 d after inoculation with *Fusarium graminearum*.

363 Zhongke 1878, wheat-*Th. elongatum* translocation line; 4460 and 4462, wheat-*Th. ponticum*

364 translocation lines; XY693, XY784 and SNTE20, octaploid partial amphiploids derived from *Th.*

365 *ponticum*. (B) Expression comparison of T26102 among 4460, 4462 and SNTE20. (C) FHB

366 resistance comparison between hexaploid partial amphiploids 8802 and 8803. The resistance was

367 evaluated at 21 d after inoculation with *Fusarium graminearum*. (D) Expression comparison of

368 T26102 between 8802 and 8803.

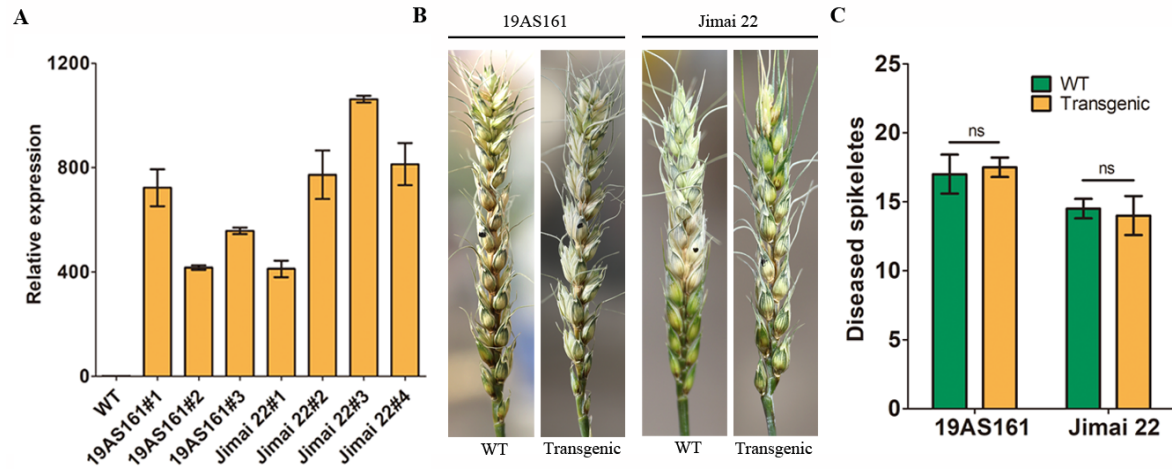

369

370 **Fig. 4. Expression analysis and FHB resistance evaluation of T26102 transgenic lines. (A)**

371 Expression analysis of transgenic lines with T26102. (B) FHB resistance comparison between wild

372 type and T<sub>0</sub> transgenic lines.

373 **Table 1. Four types of translocation lines identified from 8400 seeds.**

| Translocation type                        | Number | Percentage (%) |
|-------------------------------------------|--------|----------------|
| Short alien segmental translocation line  | 184    | 27.42          |
| Medium alien segmental translocation line | 141    | 21.01          |
| Long alien segmental translocation line   | 247    | 36.81          |
| Intercalary translocation line            | 99     | 14.76          |
| In total                                  | 671    | 100            |

374

375 **Table 2. The transcripts specific for disease-resistant interval in line Zhongke 1878**

| Transcripts | Length (bp) | Function annotation                 |
|-------------|-------------|-------------------------------------|
| T255        | 5439        | CC-NBS-LRR protein                  |
| T1375       | 4353        | CC-NBS-LRR protein                  |
| T2475       | 4015        | unknown                             |
| T2921       | 3963        | NB-ARC domain                       |
| T4619       | 3607        | unknown                             |
| T6683       | 3480        | unknown                             |
| T6981       | 3503        | CC-NBS-LRR protein                  |
| T7667       | 3443        | CC-NBS-LRR protein                  |
| T8538       | 3325        | unknown                             |
| T9007       | 3358        | CC-NBS-LRR protein                  |
| T10410      | 3204        | unknown                             |
| T11006      | 3228        | CC-NB-ARC domain                    |
| T14242      | 2493        | Retrotransposon protein             |
| T15795      | 2233        | Lectin receptor kinase              |
| T19432      | 1873        | DNA repair exonuclease SbcCD ATPase |
| T19609      | 1861        | unknown                             |
| T20934      | 1769        | Retrotransposon protein             |
| T26102      | 1394        | GST protein                         |
| T26788      | 1389        | Dirigent-Jacalin protein            |
| T28749      | 1249        | Nucleosome assembly protein         |
| T30581      | 1098        | unknown                             |
| T32029      | 996         | unknown                             |
| T32111      | 993         | unknown                             |
| T32749      | 934         | Freezing-induced protein            |
| T33754      | 844         | unknown                             |

377 **Materials and Methods:**

378 **Induction and improvement of wheat-*Th. elongatum* translocation lines**

379 At flowering stage, the spikes of wheat-*Th. elongatum* addition line 7EL were cut from the plant  
380 in the morning, and immediately radiated by  $\gamma$  rays derived from  $^{60}\text{Co}$  with a dose of 18 Gy.  
381 Then the fresh pollens were pollinated to Jimai 22 with the stamens removed in advance. The  
382 hybrid seeds were harvested at maturity. The translocation lines were identified by utilizing  
383 fluorescence *in situ* hybridization (FISH). The translocation lines in which the ratio of the length  
384 of the alien fragment to the full length of 7EL ranged from 0 to 1/4 were considered to be short  
385 alien segmental types. The translocation lines in which the ratio ranged from 1/4 to 1/2 or from 1/2  
386 to 1 were classified as medium or long alien segmental types. Using Jimai 22 as the recurrent  
387 parent, the integrated agronomic traits of the translocation lines were improved by continuous  
388 backcrossing.

389

390 **Fluorescence *in situ* hybridization (FISH)**

391 The translocation lines were screened by FISH according to previously reported methods (25). The  
392 seeds harvested were germinated on moist filter paper in a petri dish at room temperature for 2-3  
393 d. The roots were cut from the seedlings and then placed in nitrous oxide for 2h. Subsequently the  
394 roots were fixed in 90% acetic acid for 5 minutes and then washed three times by sterile water.  
395 Chromosome spreads preparation was performed as previously described (28). 7EL-1 was  
396 obtained by Dop-PCR from the 7EL library constructed by chromosome microdissection. It was  
397 specific for the genome of *Th. elongatum* and *Th. ponticum*. The probes were labeled using the  
398 nick translation method (29). Two repetitive sequences pAs1 and pSc119.2 were used to identify  
399 the whole set of wheat chromosome. 7EL-1 and pSc119.2 were labelled with Alexa Fluor-488-5-  
400 dUTP. The centromeric retrotransposon of wheat clone 6C6 and pAs1 were labeled with Texas-  
401 red-5-dCTP.

402

403 **Fusarium head blight resistance evaluation**

404 FHB evaluations were performed by using the single spikelet inoculation method (30). Equally  
405 mixing three pathogenic *F. graminearum* strains (Fg16-2, Fg16-5 and Fg16-11) and one *Fusarium*  
406 *asiaticum* strain (Fa301) in Mung bean broth produced fungal spores. For convenience, we referred  
407 to the four mixed species as *Fusarium graminearum*. Approximately 20  $\mu$ L of *F. graminearum*  
408 fungal suspension ( $1 \times 10^6$  conidia/ml) was injected into the central spikelet at early flowering stage.  
409 The inoculated spikes were covered with a plastic bag for 2 d to keep moist for fungal infection.  
410 The percentage of diseased spikelets was calculated at 10 or 21 d after inoculation.

411

412 **RNA sequencing and screening transcripts induced by *Fusarium graminearum***

413 To explore the resistance gene for Fusarium head blight, the spikes of the translocation line  
414 Zhongke 1878 were sampled for RNA sequencing after inoculating with *Fusarium graminearum*.  
415 Three spikelets around the inoculated one from at least three spikes of different plants were  
416 collected at 12, 24, 48, and 96h post inoculation and grounded in liquid nitrogen for total RNA  
417 extraction using TRIzol<sup>®</sup> Reagent (Invitrogen). As lesions were observed on the glumes at 96h  
418 post inoculation, the sample at 96h was selected for full-length transcriptome sequencing. Firstly,  
419 we aligned the sequenced transcripts on the Chinese Spring reference genome by using the  
420 software GMAP (with parameters: -min-trimmed-coverage 0.9 -min-identity 0.85). To remove the  
421 transcripts derived from the inoculated *Fusarium graminearum* isolates, the unmapped transcripts  
422 were blasted against the nucleotide database on the National Center for Biotechnology Information  
423 (NCBI). In order to confirm their origin, one to three pairs of primers were designed for the  
424 transcripts left. Polymerase chain reactions were carried out using the genome DNA of wheat-*Th.*  
425 *elongatum* 7EL, Chinese Spring, Zhongke 1878 and Jimai 22. The functions of the transcripts  
426 specific for Zhongke 1878 were annotated by using Blastx on the NCBI. In order to analysis their  
427 expression patterns, RNA sequencing was conducted using samples collected at 12, 24, 48 and 96h  
428 post inoculation. The data analysis was performed by employing HISAT2 and StringTie according

429 to the previously report (31). The FPKM value from StringTie was used to measure the expression  
430 level.

431

### 432 **Distribution, expression analysis and genetic transformation of T26102**

433 In order to detect the distribution of T26102 in different species in Triticeae, the fragment of  
434 T26102 was amplified by using the primer set of F-

435 CGATAGAAGATAGCTTCAATCAACCCTTT and R- CTA CTTACCTCGGCATACTTGTC.

436 The fragments amplified from different species were cloned onto the *pEASY*<sup>®</sup>-T1 simple cloning

437 vector (TransGen Biotech Co, Beijing) for sequencing. The sequence comparison analysis was

438 carried out using the software DNAMAN. First-strand cDNA synthesis from the total RNA was

439 performed by using the FastKing RT kit (with gDNase) (TianGen Biotech Co, Beijing). The

440 expression analyses were performed using the primer set (F-GGACTTCCCTTGGATCCTGC and

441 R-ACCGACAATCATGTCCGCAT). The gene *actin* was used as an internal standard by the

442 primer set of F-CAACGAGCTCCGTGTCGCA and R-GAGGAAGCGTGTATCCCTCATAG.

443 The relative expression of T26102 was calculated by the  $2^{-\Delta\Delta CT}$  method.

444 The 846 bp CDS of T26102 was amplified from the genomic DNA of the translocation line

445 Zhongke1878. The CDS was cloned into the MCS of the modified pWMB110 vector under the

446 *ubiquitin* promoter by using the EasyGeno Assembly Cloning kit (TianGen Biotech Co, Beijing).

447 The recombinant plasmid was transformed into *Agrobacterium* strain C58C1 (Zoman Biotech Co,

448 Beijing). The *Agrobacterium*-mediated wheat transformation using the immature embryos of

449 19AS161 and Jimai 22 was carried out as previously described (32). The positive T<sub>0</sub> plants

450 expressing T26102 confirmed by RT-PCR were used for FHB resistance evaluation.

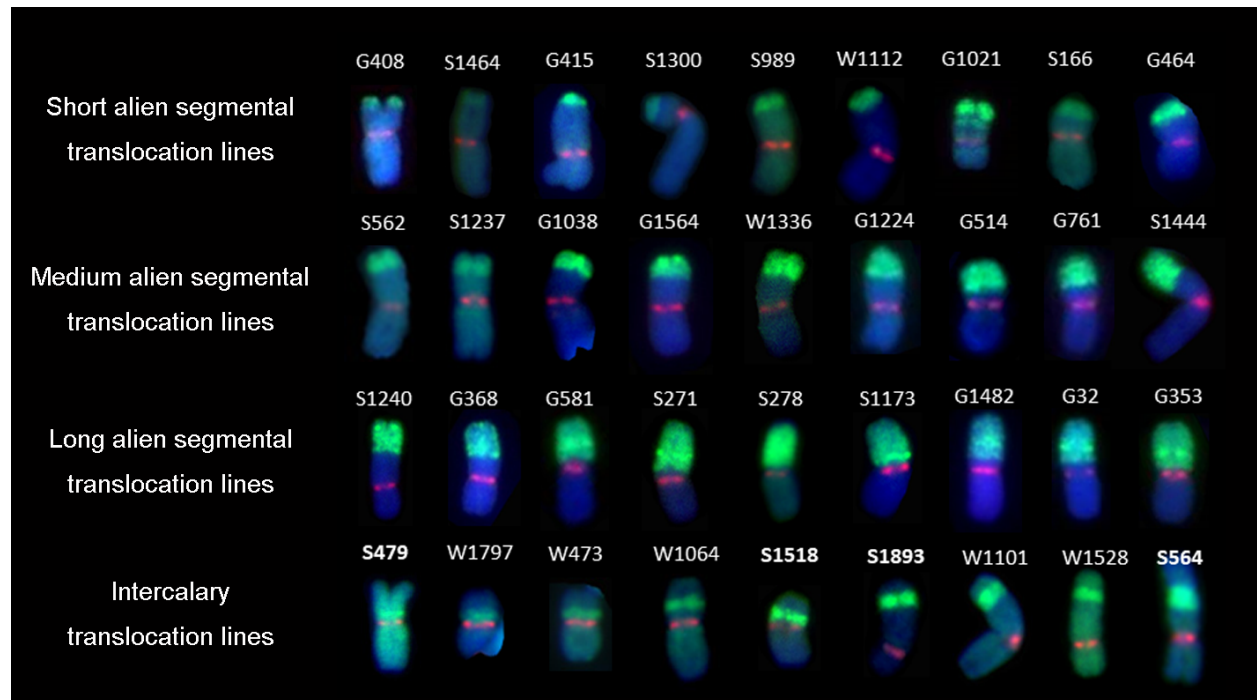

451

452 **Fig. S1. Four types translocation lines identified by FISH.** Each row represents one type, and

453 the names of the translocation lines were placed at the top of the translocated chromosome.



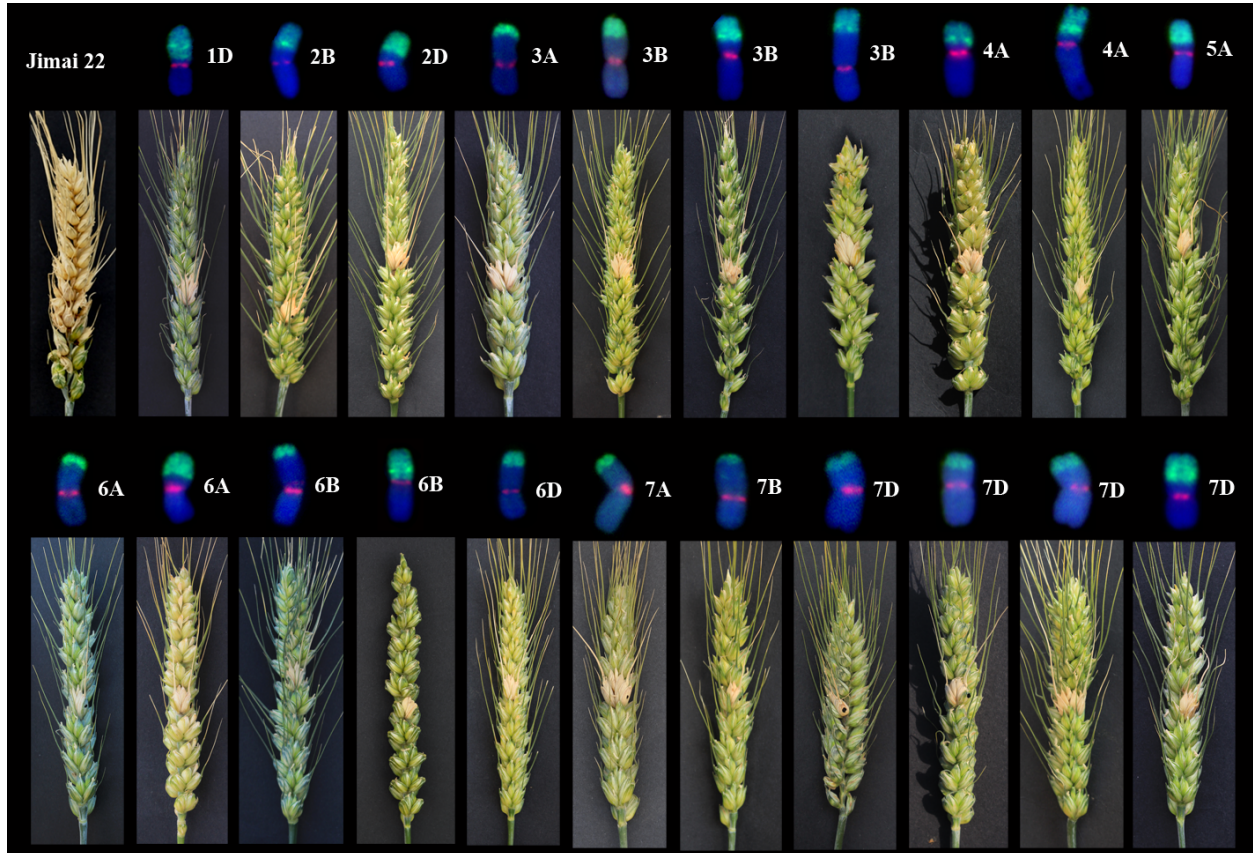

454

455 **Fig. S2. FHB resistant translocation lines identified by single spikelet inoculation method.**

456 The FHB resistance was evaluated at 21 d after inoculation with *Fusarium graminearum* in field.

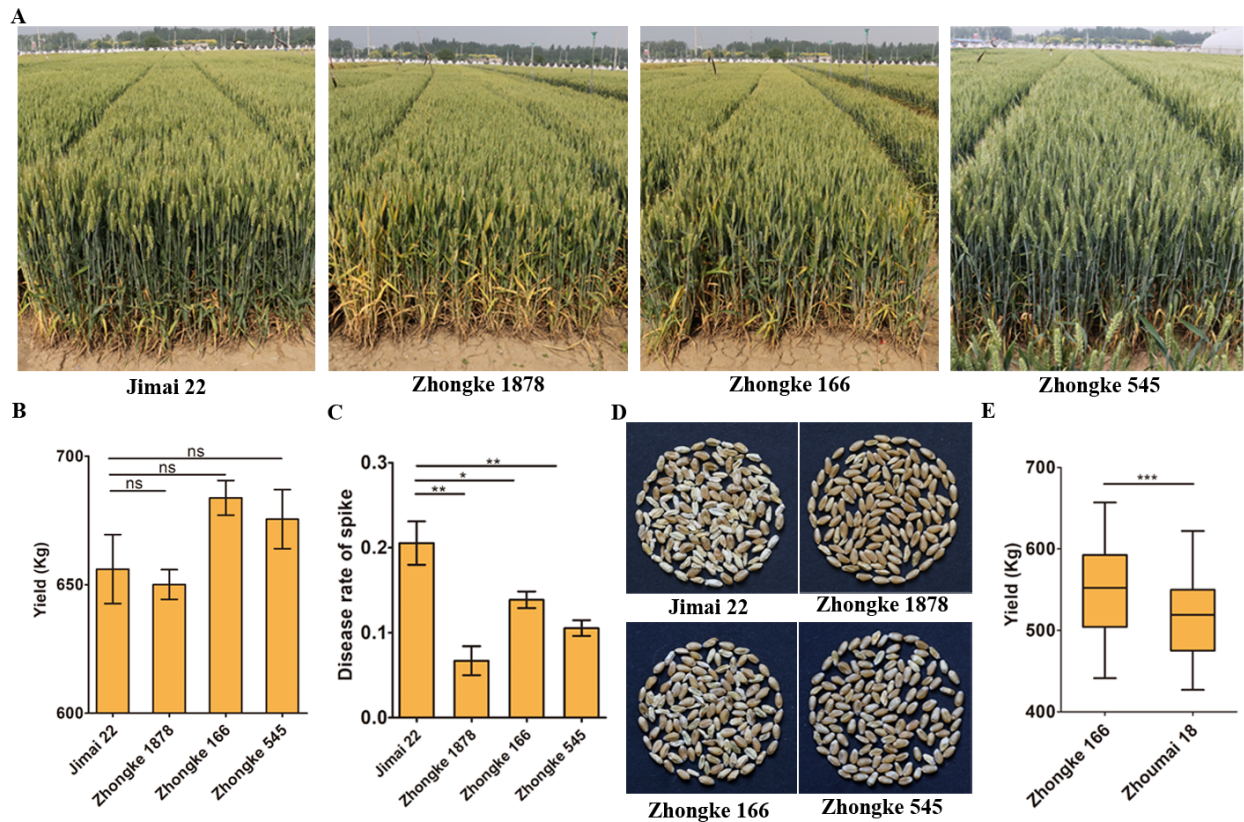

457

458 **Fig. S3. FHB resistant breeding application of wheat-*Th. elongatum* translocation lines. (A)**

459 Field plot performance of the translocation lines Zhongke 1878, Zhongke 166 and Zhongke 545.

460 (B) Grain yield of three translocation lines under natural conditions. The grain yield was measured

461 from a 13.3 m<sup>2</sup> plot. (C) The rate of diseased spikes under natural field conditions. (D) The seeds

462 of the translocation lines harvested under natural field conditions. (E) Yield comparison between

463 the translocation line Zhongke 166 and the national control Zhoumai 18. The yield data were

464 collected from the national wheat yield contest across 23 locations.

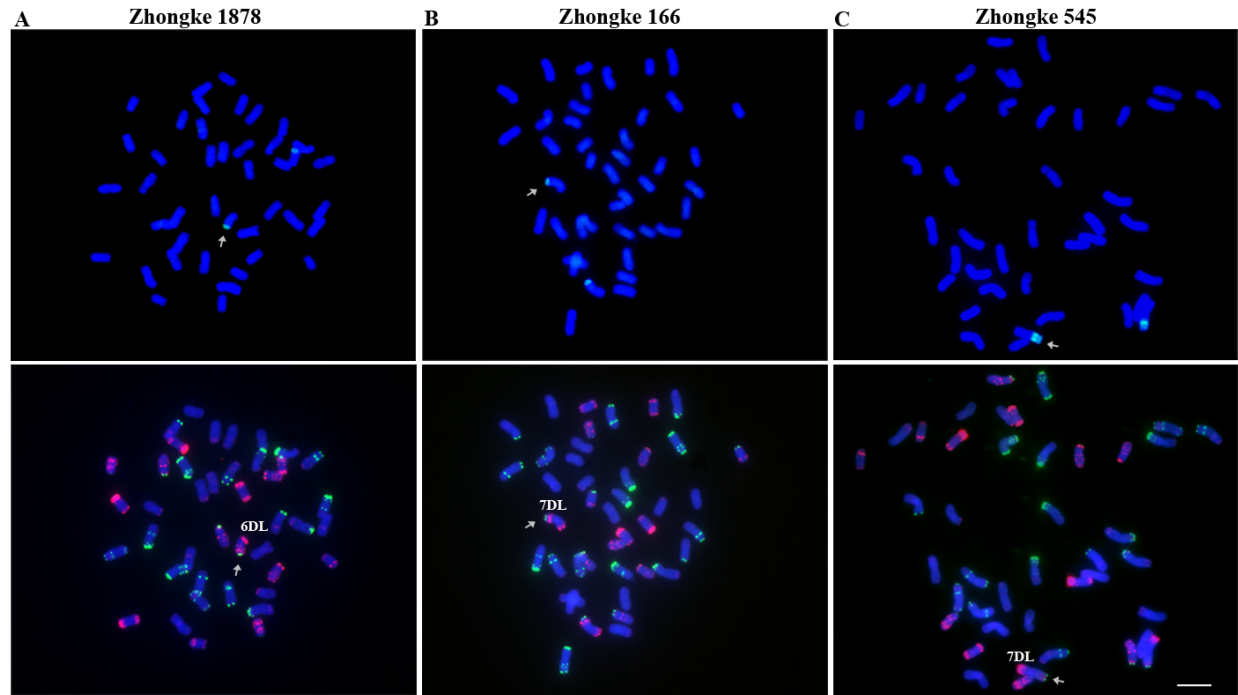

465

466 **Fig. S4. Cytological analysis of the translocation lines.** (A) Cytological analysis of Zhongke  
467 1878. (B) Cytological analysis of Zhongke 166. (C) Cytological analysis of Zhongke 545. The  
468 translocation lines were identified by using the probe 7EL-1(three upper panels) and the  
469 translocated chromosomes were identified by using the probes pAs1 (red) and pSc119.2 (green)  
470 (three lower panel).

471

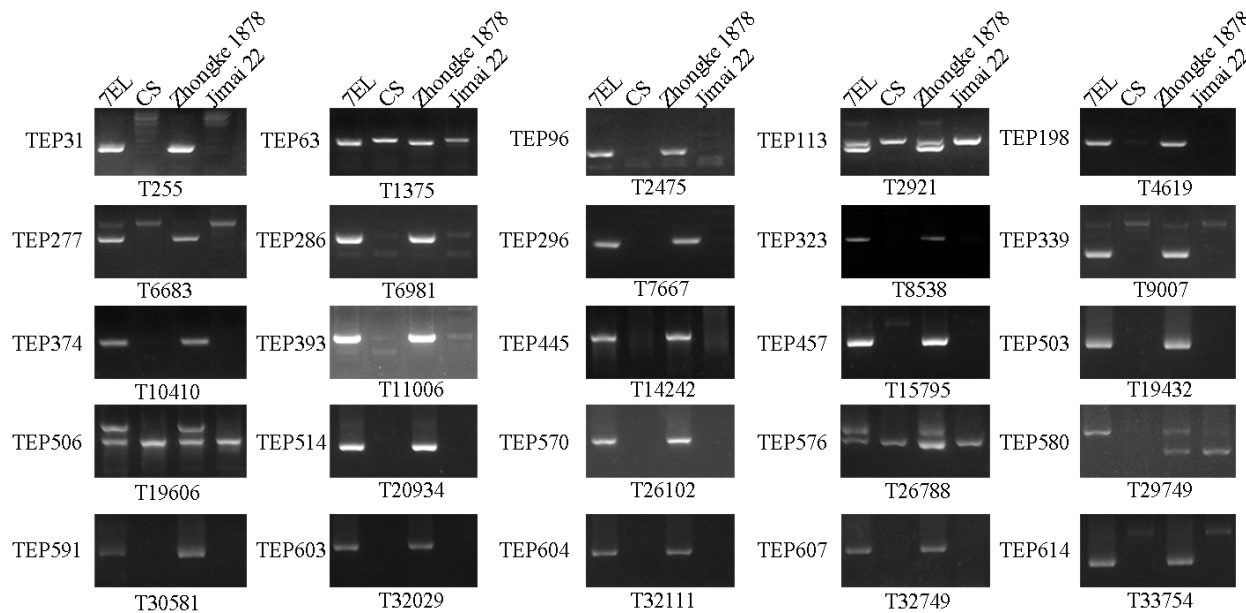

472

473 **Fig. S5. The twenty-five specific alien transcripts identified by PCR.** PCRs were performed by  
474 using the genomic DNA of the wheat-*Th. elongatum* addition line 7EL, Chinese Spring (CS),  
475 Zhongke 1878 and Jimai 22. The marker name was placed at the left of the electrophoretogram  
476 and the transcripts name placed at the bottom of the electrophoretogram.

477

478

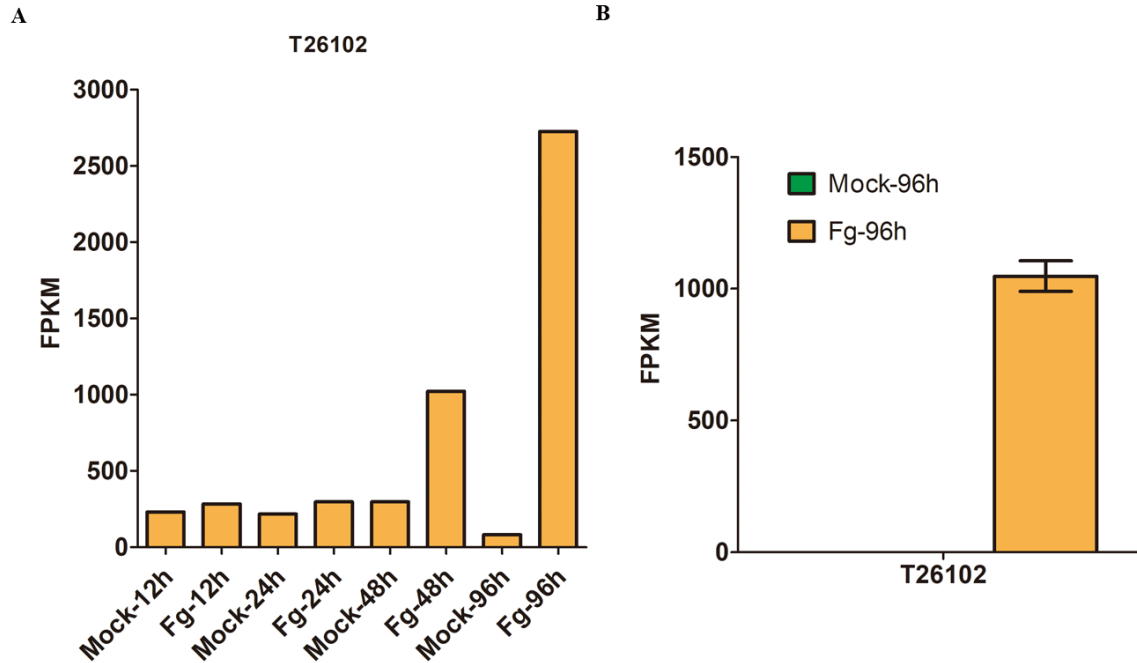

479

480 **Fig. S6. Expression pattern of T26102 after inoculating with *Fusarium graminearum*. (A)**

481 Expression pattern of T26102 in Zhongke 1878 between Mock and *Fusarium graminearum* (Fg)

482 treatment. (B) Expression analysis of T26102 in the addition line 7EL at 96h after Mock and Fg

483 treatment.



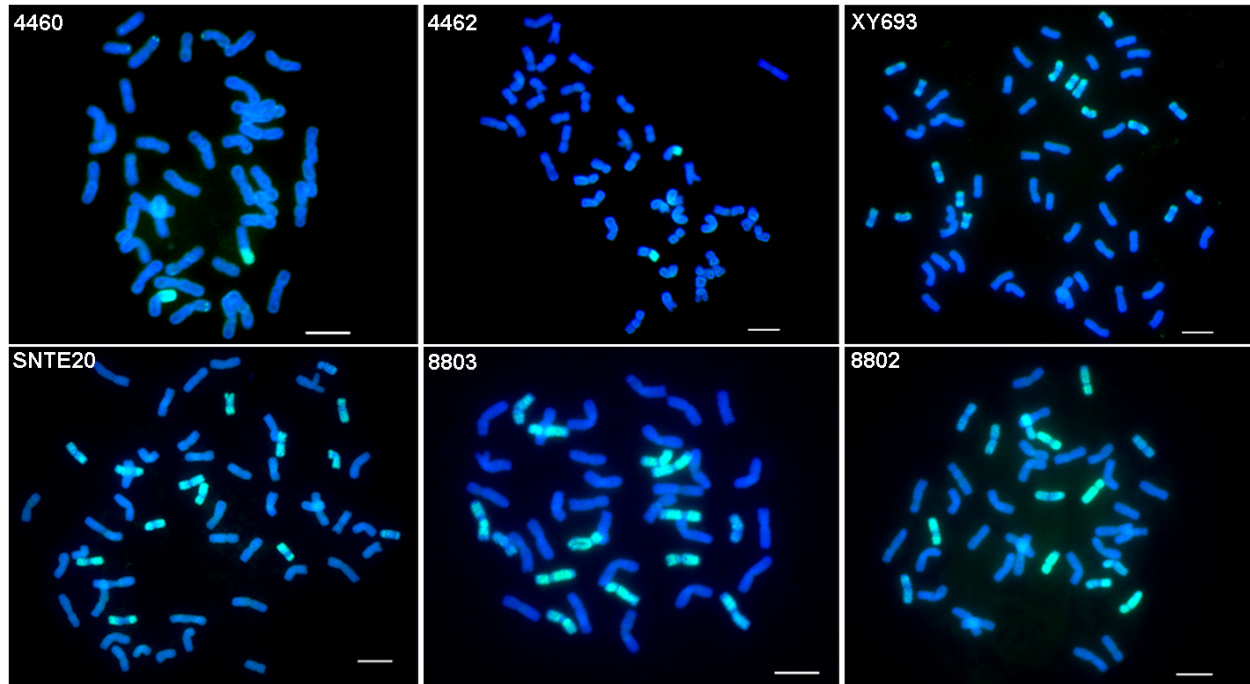

489

490 **Fig. S8. Cytological analysis of wheat-*Thinopyrum* derivate carrying T26102.** 4460 and 4462,  
491 wheat-*Th. ponticum* translocation lines; XY693 and SNTE20, octaploid partial amphiploids  
492 developed from *Th. ponticum*; 8802 and 8803, hexaploid partial amphiploids developed from *Th.*  
493 *elongatum* ( $2n=4x=28$ ).

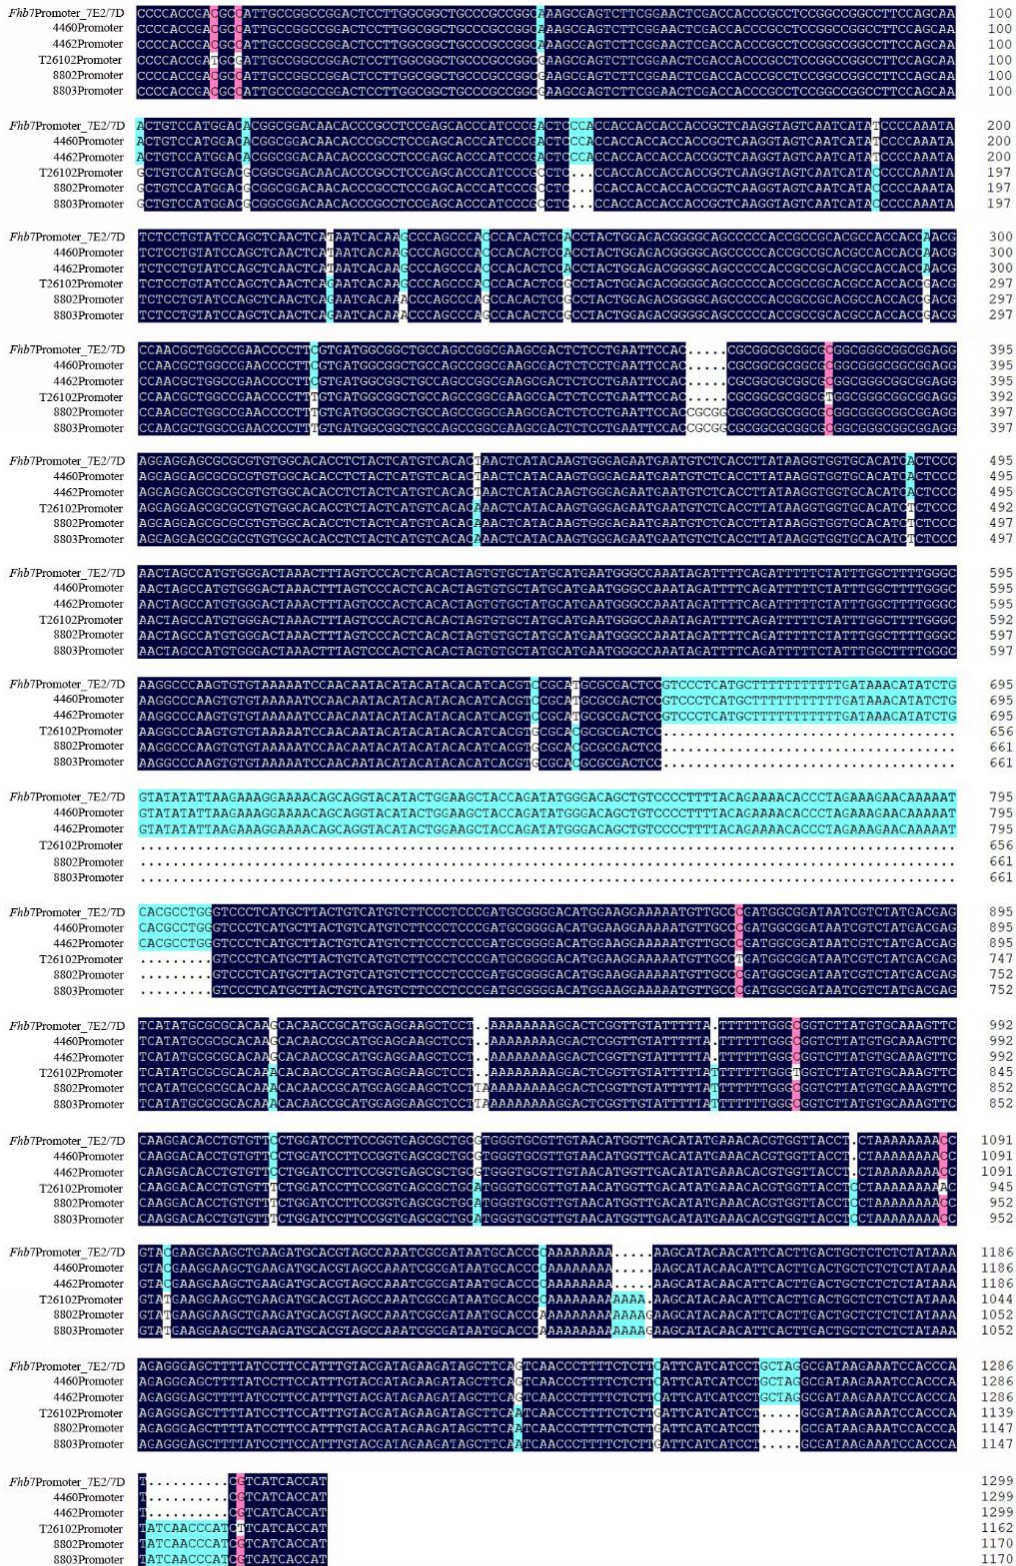

494

495 **Fig. S9. Promoter sequence alignment of T26102 homologs.**

496



497 **Data S1. (separate file)**

498 Distribution of the T26102 homologs in Triticeae.

499 **Data S2. (separate file)**

500 The sequences of twenty-five specific transcripts in line Zhongke 1878.
